# Supplementary material
Source: publisher figshare collection journal article supplement (https://future-science-group.figshare.com/ndownloader/files/31047400)
Supplement: Supplementary file 1 [file 31047400]

**
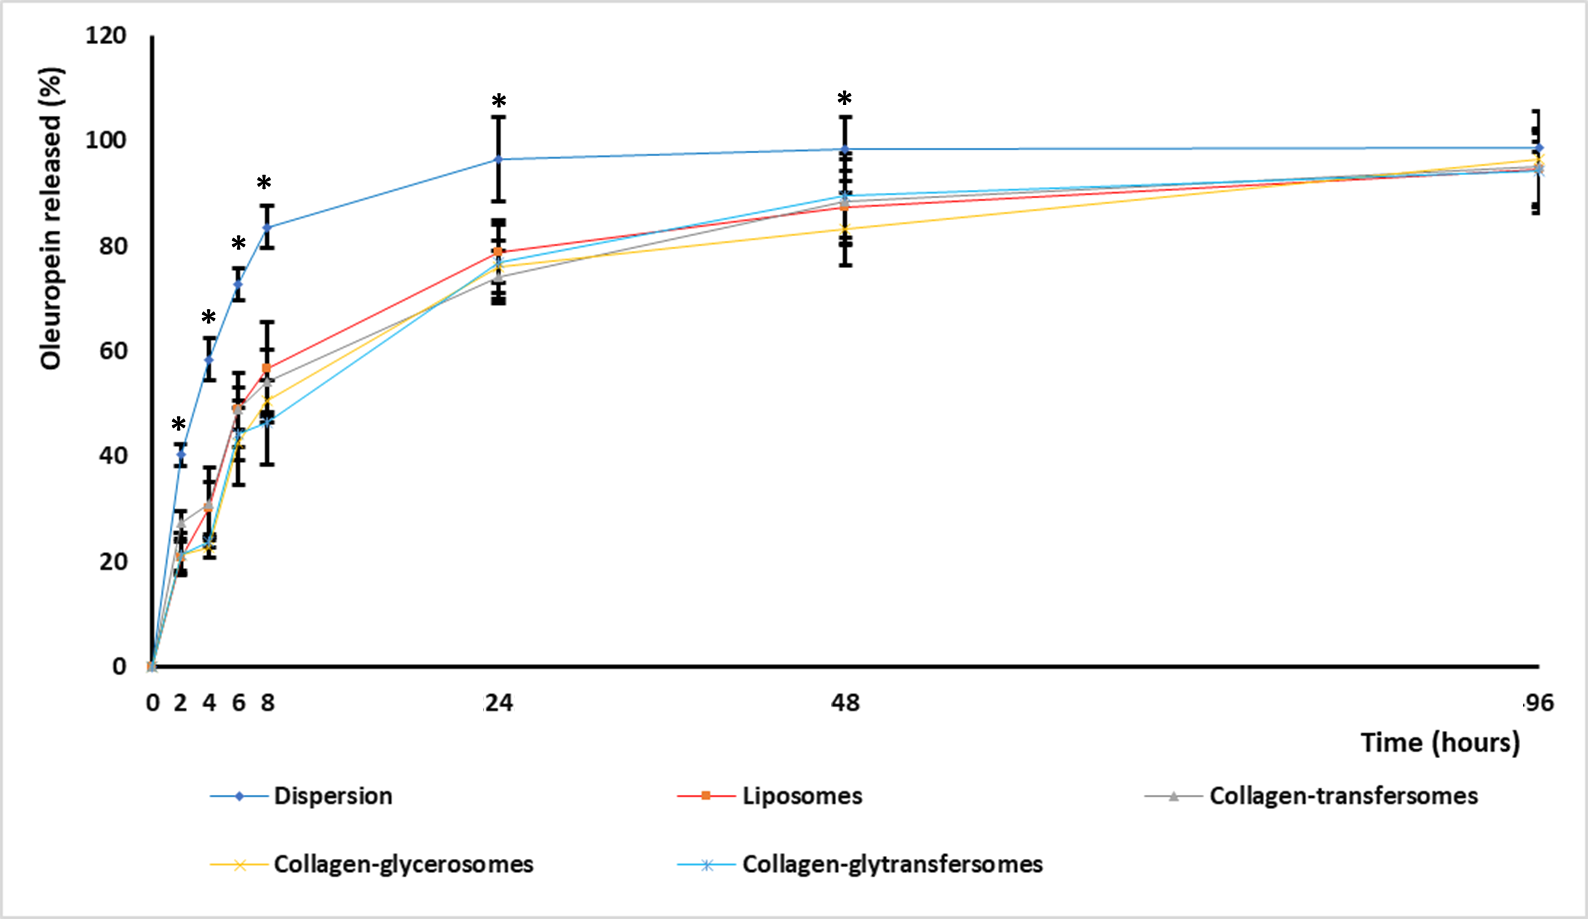
**

**Figure S1.** Percentage of oleuropein released from the dispersion or vesicles during 96 hours. The mean values ± standard deviations (error bars) are reported (n=3). Symbol * indicates values statistically different from the other values at the same time.
